# Supplementary material for: Electromagnetic levitation containerless processing of metallic materials in microgravity: thermophysical properties
Source: PubMed Central journal article supplement (PMC10154313; doi:10.1038/s41526-023-00281-4), 2023-05-02
Supplement: 41526_2023_281_MOESM1_ESM.pdf [file 41526_2023_281_MOESM1_ESM.pdf]

# **SUPPLEMENTAL MATERIAL**

## **Materials Science Coordinator at ESA:**

European Space Agency (ESA), the Netherlands,  
W. Sillekens

European Space Research and Technology Centre (ESTEC), Keplerlaan 1, Postbus 299, 2200  
AG Noordwijk, the Netherlands

## **List of participants in the involved project consortia:**

**THERMOPROP** - Thermophysical properties of liquid metals for industrial process design  
Ulm University, Germany

H.-J. Fecht (Team Coordinator), M. Mohr, R. Wunderlich, Y. Dong,  
Ulm University, Institute of Functional Nanosystems, Albert-Einstein-Allee 47, 89081 Ulm,  
Germany

DLR Cologne, Germany

J. Brillo

DLR German Aerospace Center, Institute of Materials Physics in Space, 51147 Köln, Germany

CNRS-SIMAP, France

Y. Champion, O. Budenkova, A. Fournier-Gagnoud

Centre National de la Recherche Scientifique, CNRS-SIMAP, 1130 rue de la Piscine, 38402  
St. Martin D'Herès, France

CNR-ICMATE Genova, Italy

R. Novakovic, E. Ricci

CNR-ICMATE Dept. of Genova, Via de Marini, 6, 16149 Genova, Italy

Università di Torino, Italy

L. Battezzati,

Dipartimento di Chimica Inorganica, Chimica Fisica e Chimica dei Materiali, Via Pietro Giuria, 7, 10125 Torino, Italy

Empa, Switzerland

A. Dommann, A. Neels

Empa, Lerchenfeldstr. 5, CH-9014 St. Gallen, Switzerland

University of Alberta, Canada

H. Henein,

Dept. of Chemical & Materials Engineering, University of Alberta, Edmonton, AB T6G 2G6, Canada

University of Warwick, United Kingdom

P. Srirangam,

WMG, International Digital Laboratory, University of Warwick, Coventry CV4 7AL, United Kingdom

**THERMOLAB** - Thermophysical properties of liquid metallic alloys – modeling of industrial solidification processes and development of advanced products

Ulm University, Germany

H.-J. Fecht (Team Coordinator), M. Mohr, R. Wunderlich, Y. Dong

Ulm University, Institute of Functional Nanosystems, Albert-Einstein-Allee 47, 89081 Ulm, Germany

DLR Cologne, Germany

J. Brillo

DLR German Aerospace Center, Institute of Materials Physics in Space, 51147 Köln, Germany

CNRS-SIMAP, France

Y. Champion, O. Budenkova, A. Fournier-Gagnoud

Centre National de la Recherche Scientifique, CNRS-SIMAP, 1130 rue de la Piscine, 38402  
St. Martin D'Herès, France

CNR-ICMATE Genova, Italy

R. Novakovic, E. Ricci

CNR-ICMATE Dept. of Genova, Via de Marini, 6, 16149 Genova, Italy

Università di Torino, Italy

L. Battezzati,

Dipartimento di Chimica Inorganica, Chimica Fisica e Chimica dei Materiali, Via Pietro  
Giuria, 7, 10125 Torino, Italy

Empa, Switzerland

A. Dommann, A. Neels,

Empa, Lerchenfeldstr. 5, CH-9014 St. Gallen, Switzerland

University of Alberta, Canada

H. Henein,

Dept. of Chemical & Materials Engineering, University of Alberta, Edmonton, AB T6G 2G6,  
Canada

University of Warwick, United Kingdom

P. Srirangam,

WMG, International Digital Laboratory, University of Warwick, Coventry CV4 7AL, United  
Kingdom

Tufts University, USA

D. M. Matson

Tufts University, Department of Mechanical Engineering, 200 College Ave., Medford, MA  
02155, USA

University of Massachusetts, USA

R. Hyers, G. P. Bracker

University of Massachusetts, Department of Mechanical and Industrial Engineering, 160  
Governors Drive, Amherst, MA 01003-2210, USA

Washington University, USA

K. Kelton, A. Gangopadhyay

Washington University, Department of Physics, 1 Brookings Drive – Campus Box 1105, St.  
Louis, MO 63130, USA

NASA Jet Propulsion Laboratory, USA

D. Hofmann,

Engineering & Science Directorate, NASA Jet Propulsion Laboratory/California Institute of  
Technology, MS 18-105, 4800 Oak Grove Dr., Pasadena, CA 91109, USA

Zhejiang University, P. R. China

J. Z. Jiang,

Zhejiang University, International Center for New-Structured Materials, Department of  
Materials Science and Engineering, 310027 Hangzhou, P. R. China

Gakushuin University, Japan

M. Watanabe,

Gakushuin University, Department of Physics, 1-5-1 Mejiro, Toshima, Tokyo 171-8588, Japan

Japan Aerospace Exploration Agency (JAXA), Japan

T. Ishikawa,

Japan Aerospace Exploration Agency (JAXA), 2-1-2 Sengen, Tsukuba 305-8505, Japan

Keio University, Japan

T. Hibiya,

Keio University, Graduate School of System Design and Management, 1-1 Hiyoshi 4-chome,  
Kohoku-u Yokohama 223-8526, Japan

Osaka University, Japan

T. Tanaka,

Osaka University, Division of Materials and Manufacturing Science, Graduate School of Engineering, 2-1 Yamadaoka, Suita, Osaka 565-0871, Japan

Tohoku University, Japan

H. Fukuyama,

Tohoku University, Institute of Multidisciplinary Research for Advanced Materials, 2-1-1 Katahira, Aoba-ku, Sendai 980-8577, Japan

Indian Institute of Technology Kharagpur, India

I. Manna,

Indian Institute of Technology Kharagpur, Department of Metallurgical and Materials Engineering

IIT, Kharagpur, West Bengal – 721 3012, India

Korea Research Institute of Standards and Science, South Korea

G. W. Lee,

Heat & Light Metrology Group, Division of Physical Metrology, Korea Research Institute of Standards and Science, 209 Gajeong-Ro, Yuseong-Gu, Daejeon 305-340, South Korea

Chinese Academy of Science, China

B. Wei,

Chinese Academy of Science, Vice president of Northwestern Polytechnical University, Space Materials Science and Technology, P. R. China

**ELFSTONE/LODESTAR** - Electromagnetic levitation flight support for transient observation of nucleation events / Levitation observation of dendrite evolution in steel ternary alloy rapid solidification

Tufts University, USA

D. M. Matson

Tufts University, Department of Mechanical Engineering, 200 College Ave., Medford, MA 02155, USA

**USTIP** - Unified support for THERMOLAB, ICOPROSOL, and PARSEC

(ICOPROSOL: Thermophysical properties and solidification behavior of undercooled Ti-Zr-Ni liquids showing an icosahedral shortrange)

(PARSEC: Peritectic alloy rapid solidification with electromagnetic convection order)

University of Massachusetts, USA

R. Hyers, G. P. Bracker

University of Massachusetts, Department of Mechanical and Industrial Engineering, 160 Governors Drive, Amherst, MA 01003-2210, USA

**BMW**

Saarland University, Germany

R. Busch, L. Ruschel

Saarland University, Chair of Metallic Materials, Campus C63, 66123 Saarbrücken, Germany

DLR Cologne, Germany

A. Meyer

DLR German Aerospace Center, Institute of Materials Physics in Space, 51147 Köln, Germany

University of Münster, Germany

G. Wilde

University of Münster, Institute of Materials Physics, 48149 Münster, Germany

**OXYTHERM** - Thermophysical properties of liquid alloys under oxygen influence

DLR Cologne, Germany

J. Brillo

DLR German Aerospace Center, Institute of Materials Physics in Space, 51147 Köln, Germany

Clausthal University of Technology, Germany

H. Fritze

Clausthal University of Technology, Institut für Energieforschung und Physikalische Technologien, 38640 Goslar, Germany

CNR-ICMATE Genova, Italy

R. Novakovic, E. Ricci, D. Giuranno

CNR-ICMATE Dept. of Genova, Via de Marini, 6, 16149 Genova, Italy

Doshisha University, Japan

H. Kobatake

Doshisha University, Organization for Research Initiatives & Development,  
1-3 Tatara Miyakodani, Kyotanabe, Kyoto, 610-0394, Japan

Korea University, Korea

J. Lee

Korea University, Department of Materials and Science and Engineering, Anam-Dong, Seoul  
136-713, Korea

University of Miskolc, Hungary

G. Kaptay

University of Miskolc, Department of Nano-composites, Miskolc, Egyetemvaros,  
HU-3515 Hungary.

Chiba Institute of Technology, Japan

S. Ozawa

Chiba Institute of Technology (CIT), Department of Mechanical Science and Engineering,  
2-17-1 Tsudanuma, Narashino, Chiba 275-0016, Japan.

Gakushuin University, Japan

M. Watanabe,

Gakushuin University, Department of Physics, 1-5-1 Mejiro, Toshima, Tokyo 171-8588, Japan

Tohoku University, Japan

H. Fukuyama

Institute of Multidisciplinary Research for Advanced Materials (IMRAM), Tohoku University,  
2-1-1, Katahira, Aoba-ku, Sendai-shi, Miyagi, 980-8577, Japan
